# Supplementary material for: Preparation of gemini surfactant/graphene oxide composites and their superior performance for Congo red adsorption
Source: Royal Society of Chemistry journal article supplement (doi:10.1039/c8ra10025j), 2019-01-01
Supplement: c8ra10025j1.pdf [file c8ra10025j1.pdf]

Electronic Supplementary Information

## Preparation of gemini surfactant/graphene oxide composites and their superior performance for Congo red adsorption

Shuai He,<sup>\*,a</sup> Xingli Liu,<sup>a</sup> Ping Yan,<sup>a</sup> Anqi Wang,<sup>a</sup> Jinzhu Su<sup>a</sup> and Xin Su<sup>\*,b</sup>

<sup>a.</sup> College of Chemistry and Environmental Protection Engineering, Southwest Minzu University, Chengdu 610041, China. E-mail: heshuaifish@126.com; Tel: +86-028-85928021.

<sup>b.</sup> Polymer Research Institute, State Key Laboratory of Polymer Materials Engineering, Sichuan University, Chengdu 610065, China. E-mail: xinsu@scu.edu.cn; Tel: +86-028-85461786.

**Table S1** Atomic percentages and Br/N ratios of the gemini surfactant/GO composites obtained by XPS.

| Name | Atomic mol% |            |            |
|------|-------------|------------|------------|
|      | 10-2-12/GO  | 12-2-12/GO | 14-2-14/GO |
| C1s  | 81.75       | 82.45      | 82.81      |
| O1s  | 12.93       | 11.79      | 11.63      |
| N1s  | 3.47        | 3.38       | 3.41       |
| Br3d | 1.85        | 2.38       | 2.15       |
| Br/N | 0.53        | 0.70       | 0.63       |

As shown in Fig. S1, GO exhibits a maximum absorption peak at 233 nm (the  $\pi$ - $\pi^*$  transition of the aromatic C=C bonds) and a shoulder peak at 290-300 nm (the  $n$ - $\pi^*$  transition of the C=O bonds). 12-2-12 shows a peak at 190-218 nm. However, these absorption peaks do not appear in the immersion solution of 12-2-12/GO composite. Moreover, after immersion for 100 min, no significant change in the spectra of the immersion solution is observed. These results indicate that the composites possess good stability in water.

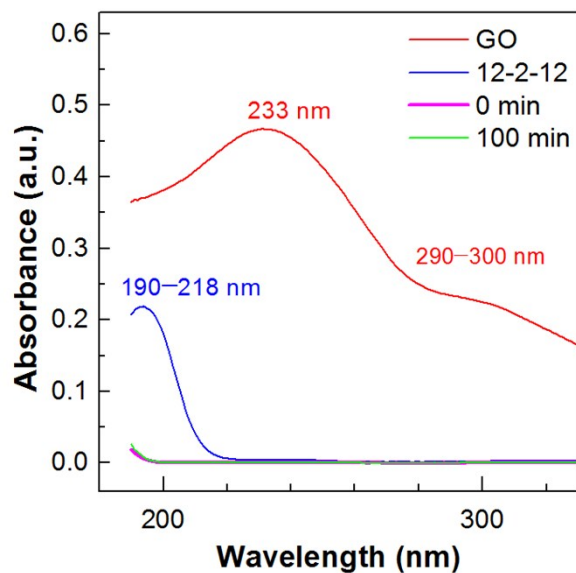

**Fig. S1** UV-vis absorption spectra of GO, 12-2-12, immersion solution of 12-2-12/GO composite for 0 min and 100 min.

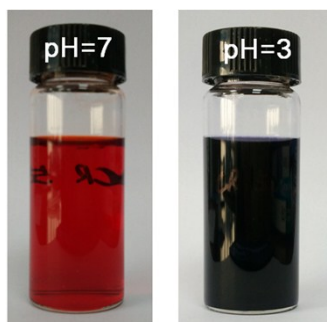

**Fig. S2** Photographs of 500 mg/L Congo red solution at pH 7 and 3.

**Table S2** Parameters of pseudo-first-order and pseudo-second-order models for the adsorption of Congo red by the gemini surfactant/GO composites.

| Gemini surfactant/GO composites | Pseudo-first-order |               |        | Pseudo-second-order |                        |        | $Q_e$ (exp) (mg/g) |
|---------------------------------|--------------------|---------------|--------|---------------------|------------------------|--------|--------------------|
|                                 | $Q_e$ (mg/g)       | $k_1$ (1/min) | $r^2$  | $Q_e$ (mg/g)        | $k_2$ (g/mg·min)       | $r^2$  |                    |
| 10-2-10/GO                      | 1967               | 0.1096        | 0.9181 | 1950                | $8.129 \times 10^{-5}$ | 0.9954 | 1905               |
| 12-2-12/GO                      | 2364               | 0.1332        | 0.9056 | 1962                | $8.473 \times 10^{-5}$ | 0.9990 | 1949               |
| 14-2-14/GO                      | 1707               | 0.1094        | 0.9774 | 2098                | $9.907 \times 10^{-5}$ | 0.9983 | 2063               |

**Table S3** Parameters of Morris-Weber model for the adsorption of Congo red on the composites.

| Gemini surfactant/GO composites | Step I                              |        | Step II                             |        | Step III                            |        |
|---------------------------------|-------------------------------------|--------|-------------------------------------|--------|-------------------------------------|--------|
|                                 | $k_{j1}$ (mg/g·min <sup>1/2</sup> ) | $r^2$  | $k_{j2}$ (mg/g·min <sup>1/2</sup> ) | $r^2$  | $k_{j3}$ (mg/g·min <sup>1/2</sup> ) | $r^2$  |
| 10-2-10/GO                      | 452.6                               | 0.9880 | 164.7                               | 0.9904 | -2.702                              | 0.5542 |
| 12-2-12/GO                      | 473.0                               | 0.9970 | 166.9                               | 0.9923 | -5.750                              | 0.7885 |
| 14-2-14/GO                      | 516.6                               | 0.9732 | 201.4                               | 0.9853 | 2.756                               | 0.6582 |

**Table S4** Parameters of the Langmuir and Freundlich isotherms for the adsorption of Congo red onto the composites.

| Gemini surfactant/GO composites | Langmuir     |              |        | Freundlich                           |       |        |
|---------------------------------|--------------|--------------|--------|--------------------------------------|-------|--------|
|                                 | $Q_m$ (mg/g) | $K_L$ (L/mg) | $r^2$  | $K_F$ [(mg/g)(L/mg) <sup>1/n</sup> ] | $n_F$ | $r^2$  |
| 10-2-10/GO                      | 2116         | 0.3675       | 0.9997 | 2075                                 | 20.70 | 0.9550 |
| 12-2-12/GO                      | 2193         | 0.08987      | 0.9987 | 2059                                 | 17.36 | 0.9767 |
| 14-2-14/GO                      | 2325         | 0.06313      | 0.9967 | 2126                                 | 16.58 | 0.9796 |
